# Supplementary material for: Magnetic CMP microspheres: multifunctional poly(phenylene ethynylene) frameworks with covalently built-in Fe3O4 nanocrystals exhibiting pronounced sensitivity for acetaminophen microdetection
Source: Royal Society of Chemistry journal article supplement (doi:10.1039/c2jm34725c), 2012-01-01
Supplement: c2jm34725c.pdf [file c2jm34725c.pdf]

## **Supporting Information**

### **Magnetic CMP Microspheres: Multifunctional Poly(phenylene ethynylene) Frameworks with Covalently Built-in Fe<sub>3</sub>O<sub>4</sub> Nanocrystals Exhibiting Pronounced Sensitivity for Acetaminophen Microdetection**

Peng Zhang,<sup>†</sup> Jia Guo,<sup>\*,†</sup> Changchun Wang<sup>†</sup>

*<sup>†</sup>State Key Laboratory of Molecular Engineering of Polymers, Department of Macromolecular Science, Fudan University, Shanghai 200433, P. R. China*

\*E-mail: guojia@fudan.edu.cn

### Section A. FTIR spectrum of the bromophenyl-modified Fe<sub>3</sub>O<sub>4</sub> nanocrystals

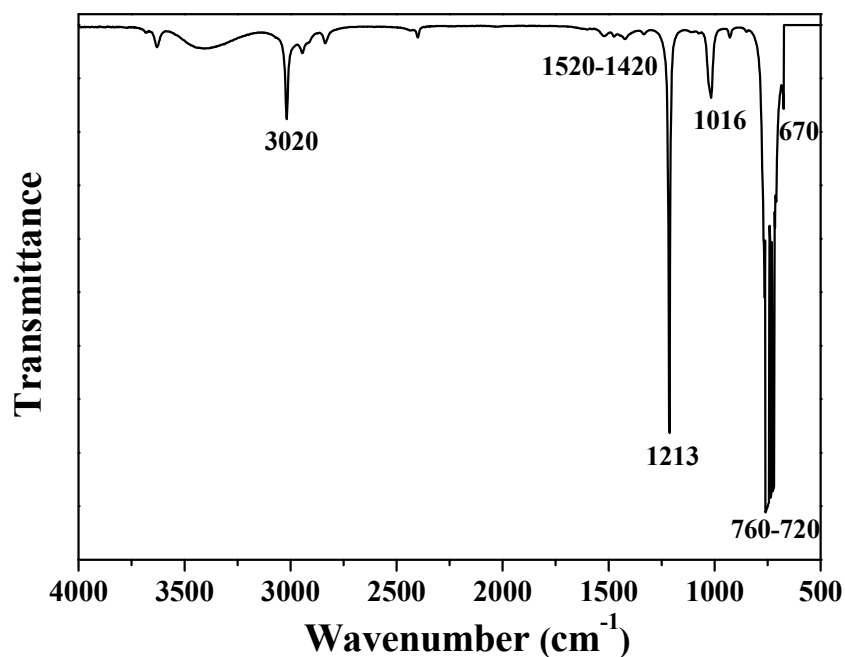

**Fig. S1** FTIR spectrum of the bromophenyl-modified Fe<sub>3</sub>O<sub>4</sub> nanocrystals. The peaks at 3020 cm<sup>-1</sup>, 1520-1420 cm<sup>-1</sup>, 1213 cm<sup>-1</sup>, 1016 cm<sup>-1</sup>, 760-720 cm<sup>-1</sup> and 670 cm<sup>-1</sup> are ascribed to aromatic C-H stretch from phenyl group, aromatic ring vibration, C-C stretch, Si-O stretch, C-H out of plane deformation band from phenyl ring, and Fe-O stretch, respectively.

## Section B. Element mapping image of Fe<sub>3</sub>O<sub>4</sub>@CNPC

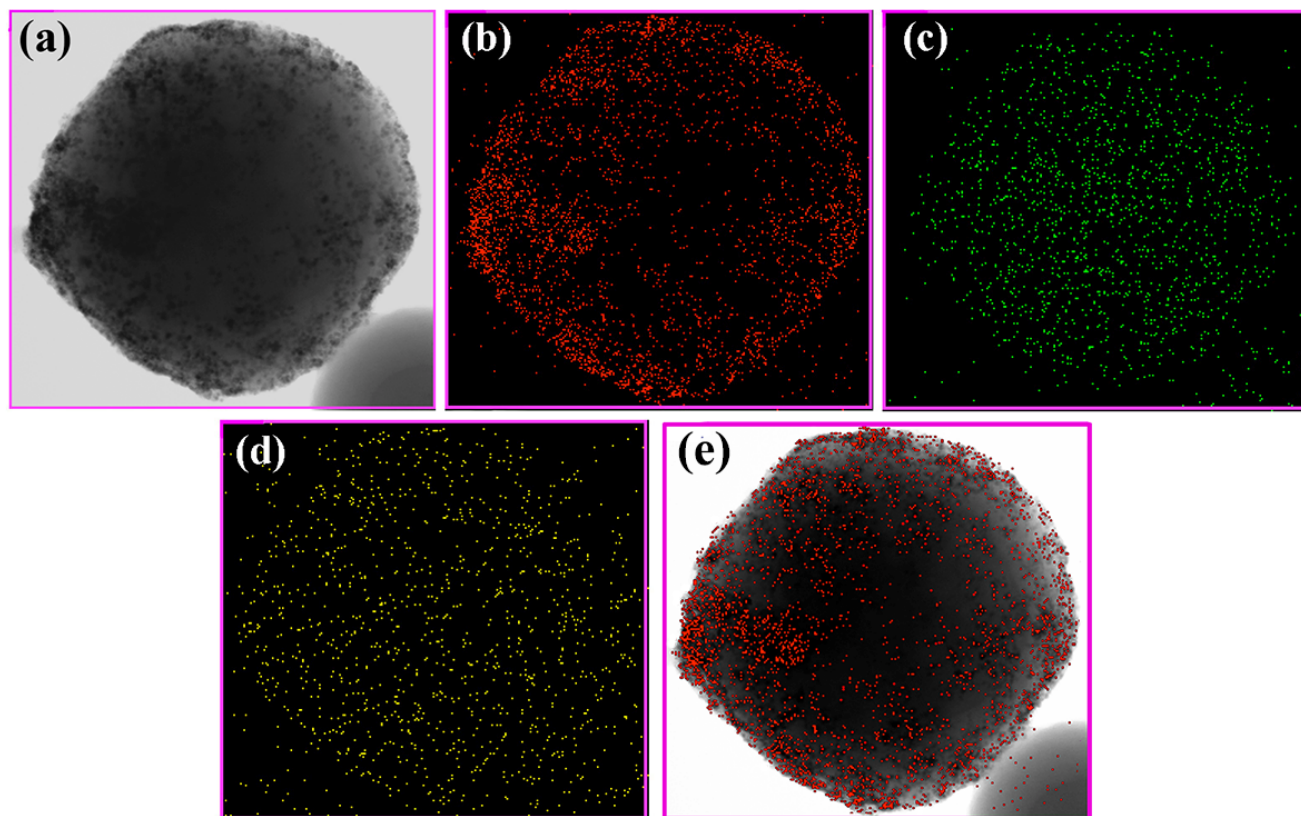

**Fig. S2** STEM image of Fe<sub>3</sub>O<sub>4</sub>@CNPC (a), element mapping images of Fe (b), Si (c) and Br (d), and a composite image (e) that combines images of (a) and (b).

### Section C. TGA profiles of $\text{Fe}_3\text{O}_4@\text{CNPC}$

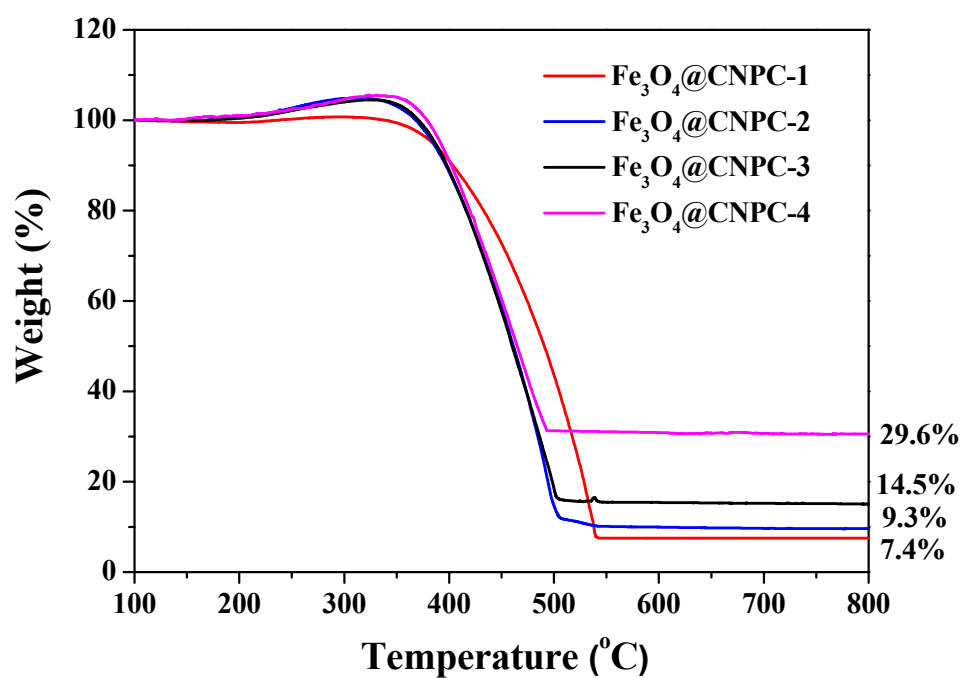

**Fig. S3** TGA profiles of four  $\text{Fe}_3\text{O}_4@\text{CNPC}$  samples with different magnetic contents, measured with the thermogravimetric analyzer in air atmosphere.

**Section D. TEM image of Fe<sub>3</sub>O<sub>4</sub>@CNPC-4**

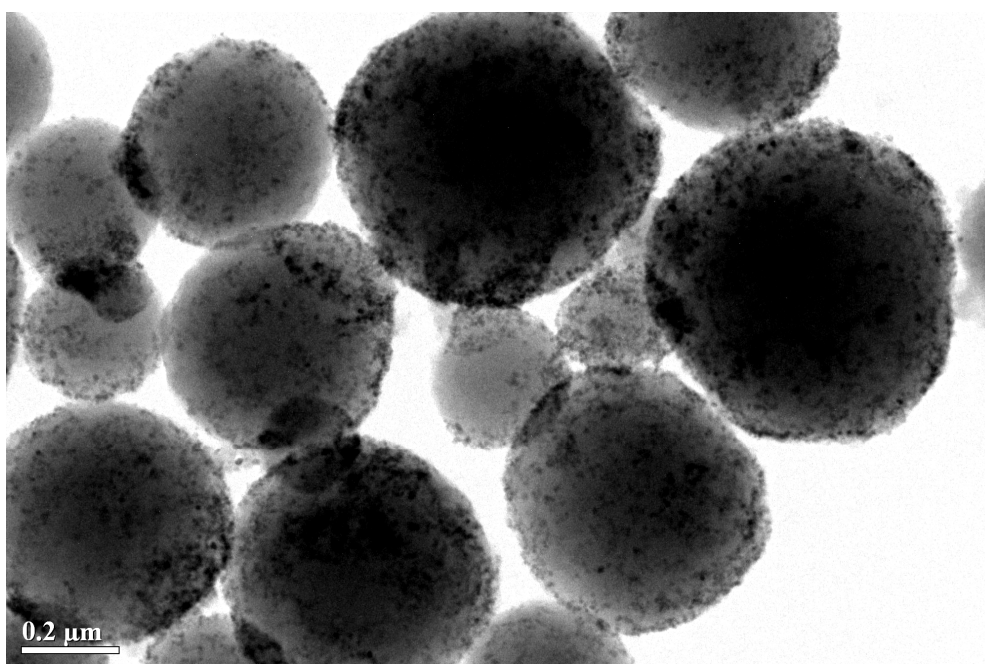

**Fig. S4** TEM image of Fe<sub>3</sub>O<sub>4</sub>@CNPC-4 with 29.6 wt.% of magnetic content.

**Section E. TEM image of control Fe<sub>3</sub>O<sub>4</sub>/CNPC synthesized using the unmodified Fe<sub>3</sub>O<sub>4</sub>**

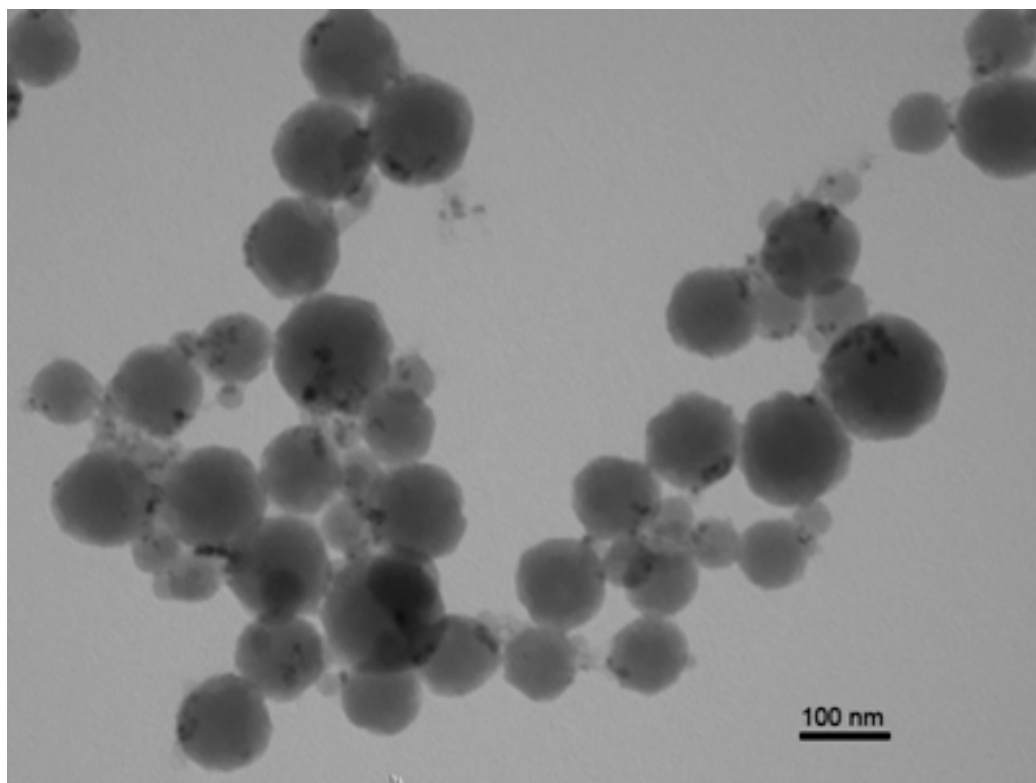

**Fig. S5** TEM image of the control Fe<sub>3</sub>O<sub>4</sub>/CNPC synthesized using the unmodified Fe<sub>3</sub>O<sub>4</sub>.

## Section F. Pore size distribution of CNPC

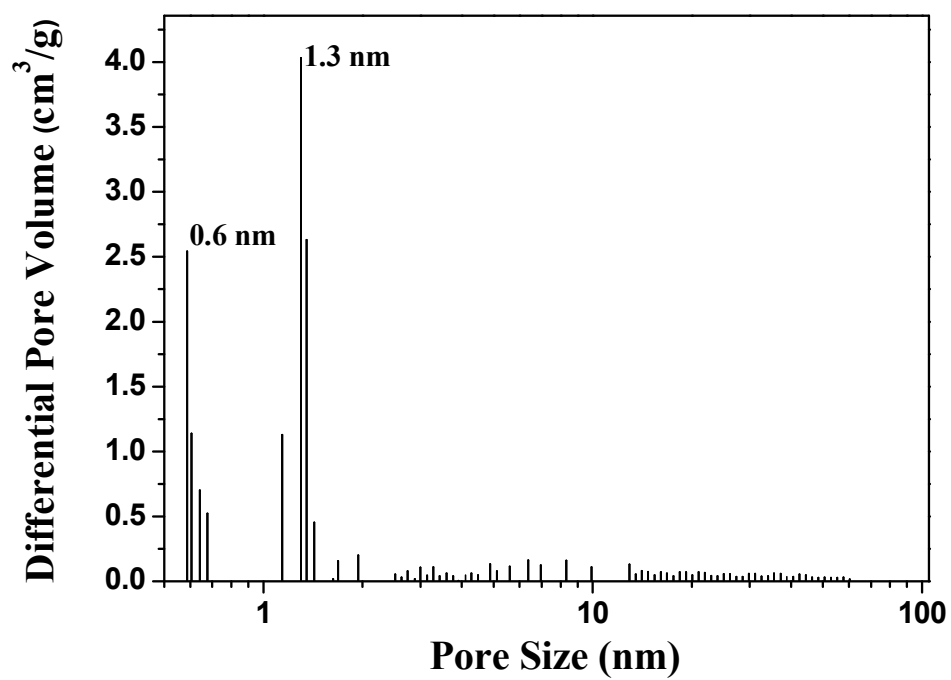

**Fig. S6** Pore size distribution of CNPC, which is calculated by NLDFIT model.

### Section G. N<sub>2</sub> uptake isotherm of control Fe<sub>3</sub>O<sub>4</sub>/CNPC

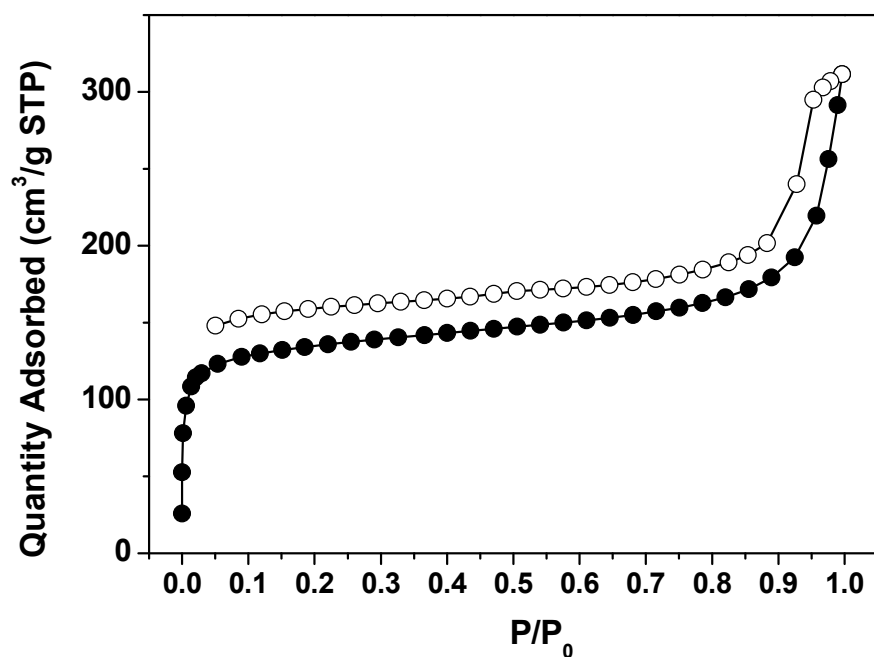

**Fig. S7** N<sub>2</sub> uptake isotherm of the control Fe<sub>3</sub>O<sub>4</sub>/CNPC synthesized by surface deposition of Fe<sub>3</sub>O<sub>4</sub> nanocrystals onto CNPC. The BET Surface area is 423.7 m<sup>2</sup>/g, the pore volume at  $P/P_0=0.99$  is 0.48 cm<sup>3</sup>/g and the pore size calculated by NLDFT method is 1.2 nm.



**Section H. A photograph of enrichment/dispersion of  $\text{Fe}_3\text{O}_4@\text{CNPC}$  in water manipulated by a magnet**

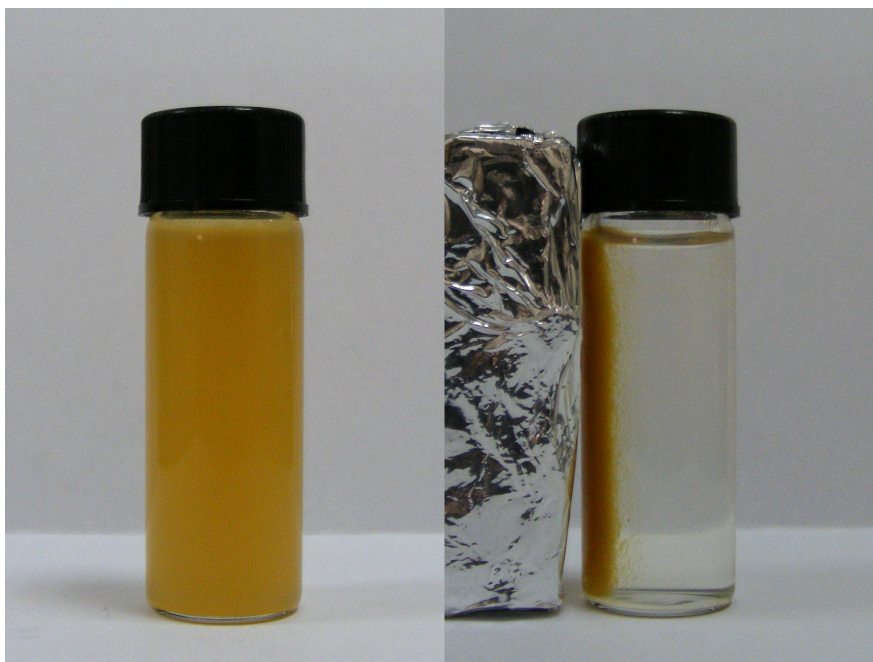

**Fig. S8** Photograph of dispersion (left) and collection (right) of  $\text{Fe}_3\text{O}_4@\text{CNPC}$  in water manipulated by a magnet.

## Section I. Detection of APAP by using CNPC

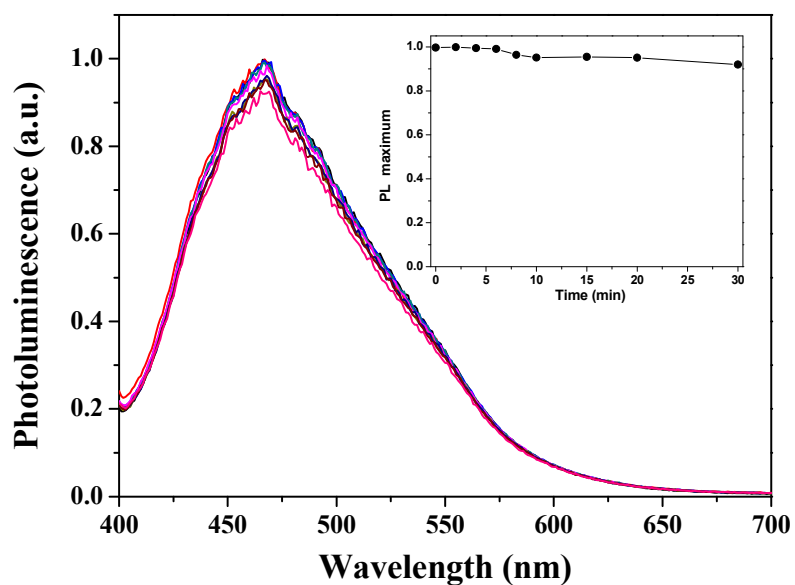

**Fig. S9** Fluorescence emission spectra of CNPC-APAP system in the presence of H<sub>2</sub>O<sub>2</sub>. Inset is a plot of PL maximum as a function of time.
